# Supplementary material
Source: ML conference proceedings conference paper supplement (https://openaccess.thecvf.com/content/CVPR_2020/html/Chen_BANet_Bidirectional_Aggregation_CVPR_2020_paper.html)
Supplement: Supplementary file 1 [file Chen_BANet_Bidirectional_Aggregation_CVPR_2020_supplemental.zip]

Archive with 2 entries (2 files):
- 04777-supp.pdf
- intro.mp4
