# Supplementary material
Source: ML conference proceedings conference paper supplement (https://openaccess.thecvf.com/content/CVPR_2020/html/Chen_BANet_Bidirectional_Aggregation_CVPR_2020_paper.html)
Supplement: Supplementary file 1 [file Chen_BANet_Bidirectional_Aggregation_CVPR_2020_supplemental.zip › 04777-supp.pdf]

# BANet: Bidirectional Aggregation Network with Occlusion Handling for Panoptic Segmentation Supplementary Material

Yifeng Chen<sup>1</sup>, Guangchen Lin<sup>1</sup>, Songyuan Li<sup>1</sup>, Bourahla Omar<sup>1</sup>, Yiming Wu<sup>1</sup>,  
Fangfang Wang<sup>1</sup>, Junyi Feng<sup>1</sup>, Mingliang Xu<sup>2</sup>, Xi Li<sup>1\*</sup>

<sup>1</sup>Zhejiang University, <sup>2</sup>Zhengzhou University  
{yifengchen, aaronlin, leizungjyun, xilizju}@zju.edu.cn

## 1. Overview

The structure of the supplementary material is arranged as follows. In Section 2, we conduct a thorough comparison between operators of our RoInlay and RoUpsample. In Section 3, we give a video introduction to our model’s pipeline.

## 2. Comparision between RoInlay and RoUpsample

In this section, we compare three patch-recovering operators, *i.e.*, RoInlay, RoUpsample and Avg RoUpsample (a modified version of RoUpsample) from three aspects, namely visual effect, runtime and experiment results.

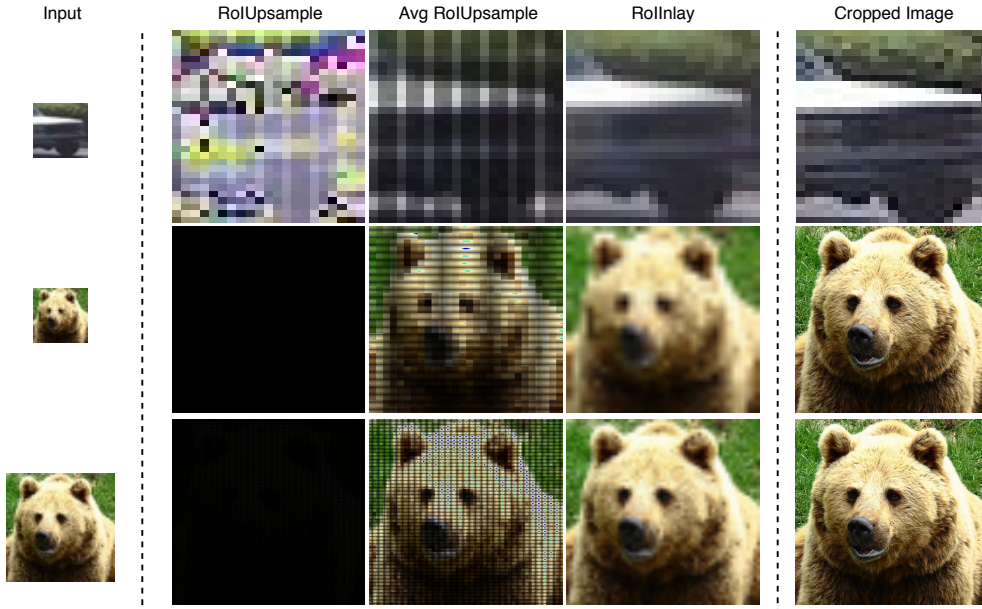

Figure 1. Comparison of RoInlay, RoUpsample and its modified version Avg RoUpsample. All of them take the output of RoIAlign as input. The output size of RoIAlign is set to  $28 \times 28$  for the first and second row and  $56 \times 56$  for the third row. The object in the first row is small ( $< 28 \times 28$ ), while the one in the second and third row is large ( $> 56 \times 56$ ).

\*Corresponding author, xilizju@zju.edu.cn

**Visual Effect** A better patch-recovering operator has an output that looks more similar to the original cropped image. To give a visual comparison between RoIInlay and RoIUpsample, we test them on raw images (RGB). Specifically, we first use RoIAlign to obtain a resized patch of an object, and then feed it to both operators to recover its resolution. Moreover, a modified version of RoIUpsample, named as Avg RoIUpsample, is provided. It replaces the summation in RoIUpsample with averaging. As shown in Figure 1, our RoIInlay performs better no matter what object area and what output setting of RoIAlign is, while either RoIUpsample or its modified version suffers from black stripes. These black stripes are formed by sampling “holes” of RoIUpsample, as described before. The output of RoIUpsample is extremely different since it sums values from multiple reference points, leading to the change of the scale of values.

**Runtime** To test the speed of RoIInlay, we record its execution time and compare it with RoIUpsample’s on GTX 1080Ti. As shown in Table 1, RoIInlay is faster than RoIUpsample under various settings. The speedup ratio grows to  $\times 3.60$  when object size is set to 128. In the COCO dataset, the average object size is  $98 \times 98$ , indicating that we can obtain about  $\times 3$  speedup with RoIInlay.

| #Objects | Object size      | Output Size      | RoIUpsample (ms) | RoIInlay (ms) | Speed Up      |
|----------|------------------|------------------|------------------|---------------|---------------|
| 50       | $28 \times 28$   | $300 \times 300$ | 3.65             | 2.17          | $\times 1.68$ |
| 100      | $28 \times 28$   | $300 \times 300$ | 6.8              | 3.9           | $\times 1.74$ |
| 100      | $28 \times 28$   | $800 \times 800$ | 9.7              | 6.7           | $\times 1.45$ |
| 100      | $56 \times 56$   | $300 \times 300$ | 34.9             | 12.1          | $\times 2.88$ |
| 100      | $128 \times 128$ | $300 \times 300$ | 440.5            | 122.4         | $\times 3.60$ |

Table 1. Speed Comparison between RoIInlay and RoIUpsample on GTX 1080Ti. The input of both operators are tensors of 512 channels. They are resized according to object sizes and put into a tensor of output size as output.

**Experimental Results** We test these two operators on the model with only SIM module to show how it affects the actual performance. As shown in Table 2, RoIUpsample will hurt the segmentation quality (SQ) by about 1%.

| Operator    | PQ          | SQ          | RQ          |
|-------------|-------------|-------------|-------------|
| RoIUpsample | 39.4        | 77.0        | <b>48.7</b> |
| RoIInlay    | <b>39.5</b> | <b>78.0</b> | <b>48.7</b> |

Table 2. Experimental results of RoIInlay and RoIUpsample. Both operators are applied to the model with only SIM module. The random seed and training schedule is set to the same.

### 3. Video Introduction

We present a video introduction, *intro.mp4*, to our approach. In this video, we depict the pipeline of our method and briefly show the procedure of each module.
